# Supplementary material
Source: PubMed Central journal article supplement (PMC1971760)
Supplement: NIHMS20210-supplement-01.pdf [file NIHMS20210-supplement-01.pdf]

Supplement Fig. S1: Alignments of chlorviral, *Arabidopsis thaliana* (At), and *Pseudomonas aeruginosa* (Pa) AIH and CPA sequences. (A) AIH. (B) CPA.

**A**

|            |                                                                                                                             |     |
|------------|-----------------------------------------------------------------------------------------------------------------------------|-----|
| AtAIH      | .MEESRESEAEHGYYMPAEWDSHAQTWIGWPERQDNWRHNALPAQRVAFADVAKAISKKEFVTVCASPAQWENARKQLP.FDIRVVEMSMNDSWFRDSCPTFTIVRKRFPVKLSSLNRNTAGI | 118 |
| PaAIH      | .MSNPTSIPRADGRMPAEWEPHEQTMVWVPEREDNWRNGGKPAQAAFAAVAKAIAARFEPVTVCASAGQYENARARLDGNIIRVVEISDDAVWRDTGPTFVHDDK.....GDVRGV        | 111 |
| PBCV-1 AIH | .....MTPKQTFGYMPGFEFQHKRTWMIFPERNDNWRQEAVPAQKTITNLARKISEFEVIMIVSRDHLNKAMDLLHDSGVKMTADSDDCWARDTCATFITNGK.....NVKAI           | 105 |
| NY-2A AIH  | .....MTPKQTFGYMPGFEFQHKRTWMIFPERNDNWRQEAVPAQKTITNLARKISEFEVIMIVSRDHLNKAMELLHDSGVKMTADSDDCWARDTCATFITNGK.....NVKAI           | 105 |
| AR158 AIH  | .....MTPKQTFGYMPGFEFQHKRTWMIFPERNDNWRQEAVPAQKTITNLARKISEFEVIMIVSRDHLNKAMELLHDSGVKMTADSDDCWARDTCATFITNGK.....NVKAI           | 105 |
| MT325 AIH  | MFCICIMFPESEDGRMPGFEFQKHSQTWMIFPERNDNWRDFAAQEQLCALANLVGKYEKVIMLVPRRYVRRALGLVS.TDVSIIIVKLTDDAWWRDTGATFVFNNGK.....EVRGV       | 110 |
| Consensus  | p g mp e h tw p r dnwr aq a e v a d w rd g f                                                                                |     |

|            |                                                                                                                           |     |
|------------|---------------------------------------------------------------------------------------------------------------------------|-----|
| AtAIH      | DWNFNWGGANDGQYNDWSEDLIVSRKILALERTIPRFQHS.MILEGGSIHVDGEGTQLVTEECLLNKNRNPMSKEQTEEBLKKYLGVQSFITWLPRLGLYCDDETNGHIDNMCCFARPGVV | 237 |
| PaAIH      | DWGFNAWGGFEGGLYFPWQRDDQVARKILLETERRARYRTLDFVLEGGSIHVDGEGTLITTEECLLNHNRNPHLSQAEIERILRDYLAVESIILWLPNGLYND.ETDGHVDNFCYARPGEV | 230 |
| PBCV-1 AIH | SWDFNSWGGNFDGLYTTWKNDQKIAEYMARISNPIIKTPGFVLEGGSIHVDGEGTLITTTKECLLSIICRNPTMSQODIEYYLKEYLNVEKIIWLEYGVADD.ETNGHVDNMACFSRPGEV | 224 |
| NY-2A AIH  | SWDFNSWGGNFDGLYTTWKNDQKIAEYMARISNPIIKTPGFVLEGGSIHVDGEGTLITTTKECLLSACRNPTMSQODIEYYLKEYLNVEKIIWLEYGVADD.ETNGHVDNMACFSRPGEV  | 224 |
| AR158 AIH  | SWDFNSWGGNFDGLYTTWKNDQKIAEYMARISNPIIKTPGFVLEGGSIHVDGEGTLITTTKECLLSACRNPTMSQODIEYYLKEYLNVEKIIWLEYGVADD.ETNGHVDNMACFSRPGEV  | 224 |
| MT325 AIH  | SDFNAWGGDIDGLYQSWDIDAQVGRVYMKARGFKMYTTPGFVLEGGSIHVDGEGTLITTEECLLSACRNPHITRDEIETNLKMYLGVKIVWLEYGTVDD.ETNGHVDNMACFARPGEV    | 229 |
| Consensus  | fn wgg g y w d leggs hvdgegt t e cll rnp i e l y l v w l g d t g h d n c r p g v                                          |     |

|            |                                                                                                                               |     |
|------------|-------------------------------------------------------------------------------------------------------------------------------|-----|
| AtAIH      | ILSWTDDETDPCYERSVEALSIVLSNSIDARGRKIQVIRKLYIPEPLYMTEEBSSGITQDGEAIPRLAGTRIAASYVNFYIANGGIIAPQFGDPIRDKEAIRVLSDFPHHSVVGIIENAREI    | 357 |
| PaAIH      | LLAWTDDQDDPNYLRCQAALRVLEESRDAKGRKLVVHKMIPGELYATQEECDGVDIVEGSCPRDPSIIRLACSYNFLTIVNCGIIPAFSDDPK.DAEARAILQRVFFHEHVMVP.GREI       | 348 |
| PBCV-1 AIH | ILAWTDDPKHPCYERSKSNAYKLLTKERDAKGRKLIHKIHIPSDMFITEEBAIGVVNSGLAVPRRAGDRIAASYVNFVMPNCAIIFPTFGDEKYDALAHKKFEEIFPEREIVGFY.SREI      | 343 |
| NY-2A AIH  | ILAWTDDPKHPCYERSKSNAYKLLTKERDAKGRKLIHKIHIPSDMFITEEBAAGVNTGLAVPRRAGDRFAASYVNFIMPNGAIIFFPTFGDEKYDALAHKKFEEIFPEREIVGFY.SREI      | 343 |
| AR158 AIH  | ILAWTDDPKHPCYERSKSNAYKLLTKERDAKGRKLIHKIHIPSDMFITEEBAAGVNTGLAVPRRAGDRFAASYVNFIMPNGAIIFFPTFGDEKYDALAHKKFEEIFPEREIVGFY.SREI      | 343 |
| MT325 AIH  | MLAWTDDKPKHPCYERSKSNAYEVLKTTLDKAKGRKRVVHKIHIPKDMYITHTIANGVVGQ..HTIPRIVGDRFAASYVNFIMPNGAIIFFPTFGDDEYDSLAKKKFEEIFPEREIVGFY.SREI | 346 |
| Consensus  | l w t d d p y r a l d a r k k i p t e g p r r a s y n f n g i i p f d d a f p r e                                             |     |

|            |                           |     |
|------------|---------------------------|-----|
| AtAIH      | VLGGNTHCITQQQPAEPTSVAENGH | 383 |
| PaAIH      | LLGGNTHCITQQQPAPRKA.....  | 368 |
| PBCV-1 AIH | LLGGNTHCITQQQPV.....      | 359 |
| NY-2A AIH  | LLGGNTHCITQQQPV.....      | 359 |
| AR158 AIH  | LLGGNTHCITQQQPV.....      | 359 |
| MT325 AIH  | LLGGNTHCITQQQPSV.....     | 363 |
| Consensus  | l ggn hc tqqp             |     |

**B**

|            |                                                                                                                              |     |
|------------|------------------------------------------------------------------------------------------------------------------------------|-----|
| AtCPA      | METEGRREVVVSSLOFACSDDISINVAEAERLVREAFAKGANITLQELFEGYYFCQAREDFFKRAKFKYKNHPTIARMQKLAKELGVVIVPSFFFEANTAHYNSIATIDADGTDLCIY       | 120 |
| PaCPA      | .....MTRNVTVAAITQMACSWDRPANLARAERLVRQAARGAQITLQELFETPYFCQKPNPDYLCIATITVEENAAIAHFQALARELQVVLPTISFFFERAQRARFNSIAVIDADGGNLCVY   | 115 |
| PBCV-1 CPA | .....MSRKVTIATITQFACTHDIFGNTERAEMLVRNAAANGAQVIVLQELFATKYFCQTCSPQYFKFADFPADDSVIVVEIFSKLAKELGVVIVPIEPPFEKDGNNYNSVAVADADGSIVGVY | 115 |
| NY-2A CPA  | .....MTRKVTIATITQFACTHDIFGNTERAEMLVRNAAANGAQVIVLQELFATKYFCQTCSPQYFKLADFPADDSVIVVEIFSKLAKELGVVIVPIEPPFEKDGNNYNSVAVADADGSIVGVY | 115 |
| AR158 CPA  | .....MTRKVTIATITQFECTIKDVMGNLERAERMIRNAAANGAQVIVLQELFEMMYICQICQYPKFKKHAEPVKNKSGTVHMFNLAKELCVVIVPIEPPFEKDGNNYNSVAVADADGSIVGVY | 115 |
| MT325 CPA  | .....MKITITAAALQFSVSKNAEDNLRTAERMVRNAAANGANVIVLPELFCARYFCQEQKQKWFALAEITVEESHVVRSHAKLAGELGVVIVPIEPPFERDRNNYNSVAVADADGSIIIGTY  | 113 |
| FR483 CPA  | .....MKITITAAALQFSVSKNAEDNLRTAERMVRNAAANGANVIVLPELFCARYFCQEQKQKWFALAEITVEESHVVRSHAKLAGELGVVIVPIEPPFERDRNNYNSVAVADADGSIIIGTY  | 113 |
| Consensus  | q n ae r a a g a i e l f y c q a l a e l v v p f f e n s a d a d g g y                                                       |     |

|            |                                                                                                                          |     |
|------------|--------------------------------------------------------------------------------------------------------------------------|-----|
| AtCPA      | RKSHIPDGPYQEKFYFNPGLDIGFKVFOTKFAKIGVAICWDQWFEEAARAVLQGAELLFYPTAIGSEPEQDQGLDSRDHWRRVMQGHAGANVPLVASNRIGKEIIETEHGPSQITIFVGT | 240 |
| PaCPA      | RKSHIPDGPYHEKYYFNPGLDIGFKVQTRYARIGVGCWDQWFEEASARSMALLGAELLFYPTAIGSEPHDASISSRDHWQRVQGHAGANLPLVASNRIGRE...EQDGYDITIFVGS    | 231 |
| PBCV-1 CPA | RKTHIPQSKCYEEKFYFTPSNPNYEVFETKFGKMGVLCWDQWFSEAAKCLALEGADFIVYPTAIGSEPEFPNGESYLHWARTITIGHAAATGVPVIVANRIGRE...RFGTKIDFFCG   | 231 |
| NY-2A CPA  | RKTHIPQSKCYEEKFYFTPSNPNYEVFETKYGKLGVLICWDQWFSEAAKCLALEGADFIVYPTAIGSEPEFPNGESYLHWARTITIGHAAATGVPVIVANRIGRE...RFGTKIDFFCG  | 231 |
| AR158 CPA  | RKTHIPQSECYEEKFYFTPSNPNYRVFETKFGKMGVLCWDQWFSEAAKCLALEGADFIVYPTAIGTEPEFPDGETYLHWARTITIGHAAATGVPVIVANRIGHE...ELGSEIDFYCG   | 231 |
| MT325 CPA  | RKTHIPQGDICYNEKYFTPGNNGYGVFNTKFGVMGVLICWDQWNEEAARCLALDGAADFIVYPTAIGSEPAFPDGESEYMHWARTIQGSAASGIPVIVANRIGRE...RFGTKIDFYCG  | 229 |
| FR483 CPA  | RKTHIPQGDICYNEKYFTPGNNGYGVFNTKFGVMGVLICWDQWNEEAARCLALDGAADFIVYPTAIGSEPAFPDGESEYMHWARTIQGSAASGIPVIVANRIGRE...RFGTKIDFYCG  | 229 |
| Consensus  | rk hip y ek yf p v t gv icwdqw e a l ga yptaig ep hw r g a p nr ge i f g                                                 |     |

|            |                                                                                                                      |     |
|------------|----------------------------------------------------------------------------------------------------------------------|-----|
| AtCPA      | SFIADGTCGAVVITQVGGVPEKNGGVDPEPVDLKGYTKYTFDLDALLENHRAFVWGLYRDRRPELYSRLV.....AVLVAQFDLDMIKSKRQSWCVFRDRRPDLVKVLTMDGNL.. | 299 |
| PaCPA      | SFIADPFCGKVEELNRTEF.....GILVHTFDLDALETRSAWCVFRDRRPDLVGLKTLTDGSLES                                                    | 292 |
| PBCV-1 CPA | SFIADGTCGAVVITQVGGVPEKNGGVDPEPVDLKGYTKYTFDLDALLENHRAFVWGLYRDRRPELYSRLV.....                                          | 298 |
| NY-2A CPA  | SFIADGTCGAVVITQVGGVPEKNGGVDPEPVDLKGYTKYTFDLDALLENHRAFVWGLYRDRRPELYSRLV.....                                          | 298 |
| AR158 CPA  | SFIADGTCGAVVITQVGGVPEKNGGVDPEPVDLKGYTKYTFDLDALLENHRAFVWGLYRDRRPELYSRLV.....                                          | 299 |
| MT325 CPA  | SFIATNNKCEVVAQVGGEPQKNGGVDPEPVMKSHIKITITDTEENDMFRAWGLYRDRRPELYNRLVI.....                                             | 296 |
| FR483 CPA  | SFIATNNKCEVVAQVGGEPQKNGGVDPEPVMKSHIKITITDTEENDMFRAWGLYRDRRPELYNRLVI.....                                             | 296 |
| Consensus  | sf g v d r wg rdr rp ly l                                                                                            |     |
