# Supplementary material
Source: PubMed Central journal article supplement (PMC1971760)

Supplement Fig. S2. Bayesian analysis of AIH and CPA phylogenies. Maximum consensus trees were constructed as described in the "Materials and methods" section. Accession numbers are for the NCBI protein database (<http://www.ncbi.nlm.nih.gov/entrez/query.fcgi?db=Protein>), except the *Chlamydomonas* accession numbers, which are for the *Chlamydomonas* genome database at <http://genome.jgi-psf.org/Chlre3/Chlre3.home.html>. The numbers at the branches give the clade credibilities. Accession numbers in bold mark species which are present in both trees and where both genes are clustered. (A) AIH tree. (B) CPA tree.

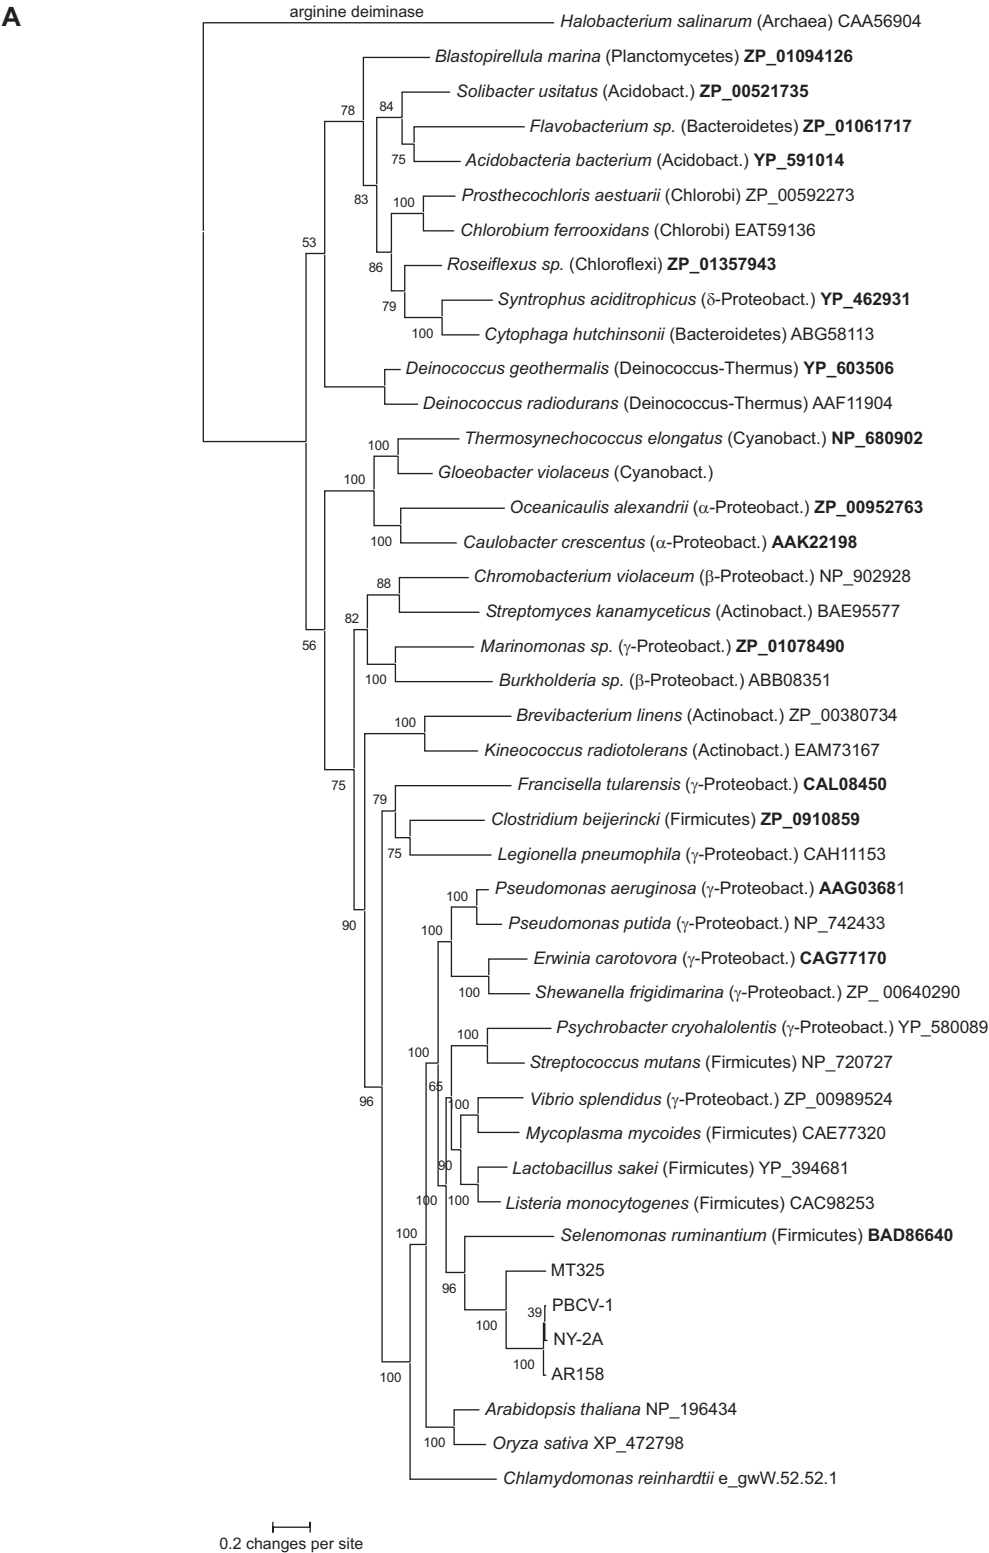

B

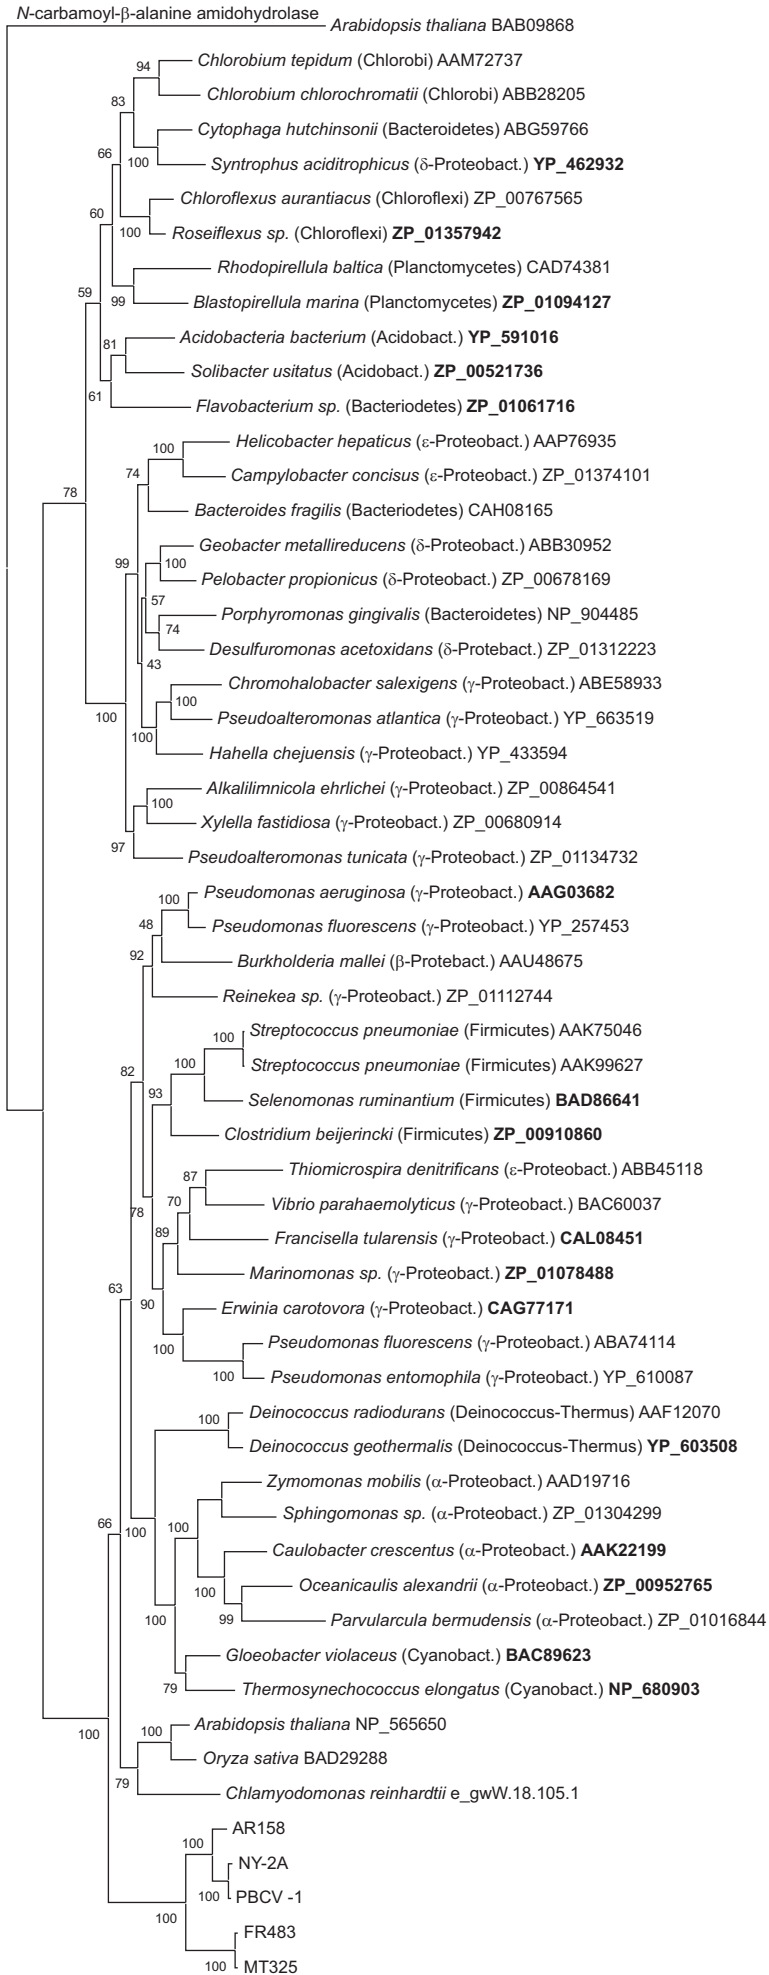

Supplement: NIHMS20210-supplement-FigS2.pdf [file NIHMS20210-supplement-FigS2.pdf]
