# Supplementary material
Source: PubMed Central journal article supplement (PMC1971760)
Supplement: NIHMS20210-supplement-TableS3.pdf [file NIHMS20210-supplement-TableS3.pdf]

Supplement Table S3. Growth conditions for *E. coli* expressing viral polyamine biosynthesis genes.

| Enzyme     | Expression culture                                         |
|------------|------------------------------------------------------------|
|            | (volume/pre-induction phase/IPTG concentration/expression) |
| PBCV-1 AIH | 100 ml/1 h, 37 °C/1 mM/8 h, 23 °C                          |
| NY-2A AIH  | 100 ml/1 h, 37 °C/1 mM/8 h, 23 °C                          |
| MT325 AIH  | 300 ml/6 h, 23 °C/0.1 mM/24 h, 16 °C                       |
| PBCV-1 CPA | 300 ml/1 h, 37 °C/0.3 mM/8 h, 28 °C                        |
| NY-2A CPA  | 300 ml/2.5 h, 37 °C/0.3 mM/6.5 h, 28 °C                    |
| MT325 CPA  | 300 ml/6 h, 23 °C/0.1 mM/24 h, 16 °C                       |
